# Supplementary material for: On the structure of the thiolated Au6Ag7cluster
Source: Royal Society of Chemistry journal article supplement (doi:10.1039/c4cp02273d), 2014-07-16
Supplement: c4cp02273d1.pdf [file c4cp02273d1.pdf]

## SUPPORTING INFORMATION

### On the structure of the thiolated Au<sub>6</sub>Ag<sub>7</sub> cluster

Alfredo Tlahuice-Flores

*CICFIM-Facultad de Ciencias Físico-Matemáticas, Universidad Autónoma de Nuevo León, San Nicolás de los Garza, NL 66450, México.*

*Email: tlahuicef@gmail.com*

Part I. **Figure S1.** Calculated optical absorption spectra of [Ag<sub>13</sub>Au<sub>12</sub>(SH)<sub>18</sub>]<sup>-</sup> cluster.

Part II. **Table S1.** Possible combinations for [Au<sub>13</sub>(SR)<sub>10</sub>]<sup>+</sup>.

**Table S2.** Relative total energy ( $E_{\text{rel}}$ ), core composition and HOMO-LUMO (HL) gap of **Iso1-Iso9** isomers.

Part III. **Figure S2.** Bond length distribution of **Iso1-Iso4**.

Part IV. **Figure S3.** Structures of **Iso5-Iso9** isomers of [Au<sub>6</sub>Ag<sub>7</sub>(SCH<sub>3</sub>)<sub>10</sub>]<sup>+</sup> with higher energies. Their relative total energies with respect to **Iso1** are shown in Table S2.

Part V. **Figure S4.** Simulated XRD patterns of **Iso5-Iso9**.

Part VI. **Figure S5.** KS orbital energies for **Iso1-Iso4**. The electronic transitions of the three distinguishable peaks in Figure 3 are depicted.

Part VII. **Table S3.** Excitation energy, oscillator strength, electronic transitions, and relative contributions (in percentage) of the atomic orbitals to each molecular orbital for the major peaks shown in Fig. 3 of **Iso1-Iso4**.

Part VIII. Relaxed Cartesian coordinates of **Iso1-Iso4**.

## PART I

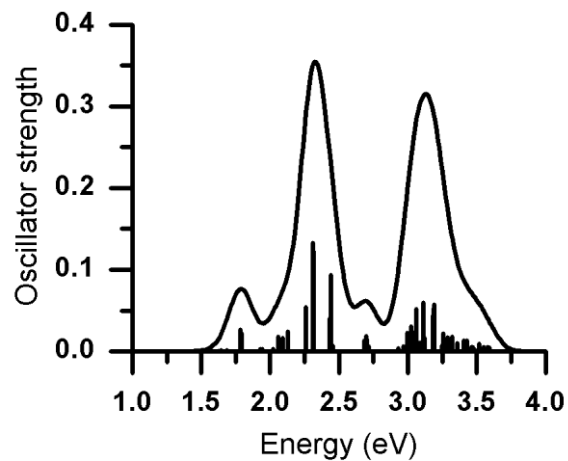

**Figure S1.** Calculated optical absorption spectrum for  $[\text{Ag}_{13}\text{Au}_{12}(\text{SH})_{18}]^-$  cluster in good agreement with the calculations reported in Fig. 1 of the reference: C. M Aitkens, *J. Phys. Chem. C* 2008, **112**, 19797-19800.

## PART II

**Table S1.** Possible combinations for the  $[\text{Au}_{13}(\text{SR})_{10}]^+$  cluster.

| No. core atoms | Ligands type         | No. Atoms in ligands |
|----------------|----------------------|----------------------|
| 4              | 1 level-9            | 9                    |
| 5              | 2 level-4            | 8                    |
| 5              | 1 level-2, 1 level-6 | 8                    |
| 5              | 1 level-3, 1 level-5 | 8                    |
| 6              | 2 level-2, 1 level-3 | 7                    |

The ligands type follows the notation: Level-1 is a monomer motif; level-2 is a dimer motif and so on.

**Table S2.** Relative total energy ( $E_{\text{rel}}$ ), core composition and HOMO-LUMO (HL) gap of **Iso1- Iso9** isomers.

| Isomer      | Core                            | $E_{\text{rel}}$ , eV | HL gap, eV |
|-------------|---------------------------------|-----------------------|------------|
| <b>Iso1</b> | Ag <sub>6</sub>                 | 0.00                  | 1.68       |
| <b>Iso2</b> | Ag <sub>4</sub>                 | 0.33                  | 1.59       |
| <b>Iso3</b> | AuAg <sub>3</sub>               | 0.41                  | 1.62       |
| <b>Iso4</b> | Au <sub>2</sub> Ag <sub>2</sub> | 0.49                  | 1.62       |
| <b>Iso5</b> | Ag <sub>4</sub>                 | 0.51                  | 1.57       |
| <b>Iso6</b> | AuAg <sub>3</sub>               | 0.58                  | 1.68       |
| <b>Iso7</b> | Au <sub>2</sub> Ag <sub>2</sub> | 0.73                  | 1.66       |
| <b>Iso8</b> | Au <sub>4</sub>                 | 1.06                  | 1.49       |
| <b>Iso9</b> | Au <sub>6</sub>                 | 1.39                  | 1.33       |

### PART III

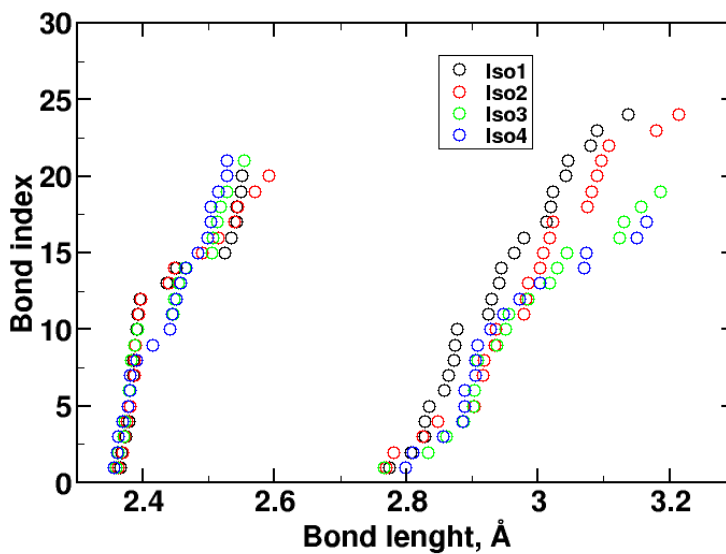

**Figure S2.** Bond length distribution of **Iso1-Iso4**.

PART IV

Iso5

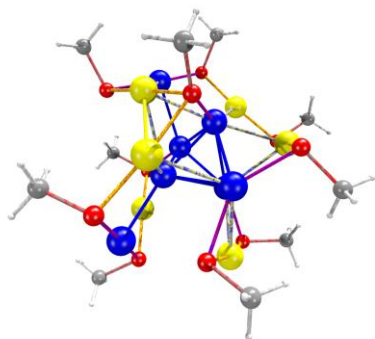

Iso6

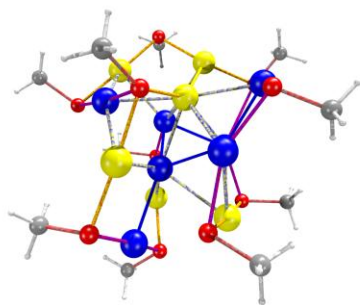

Iso7

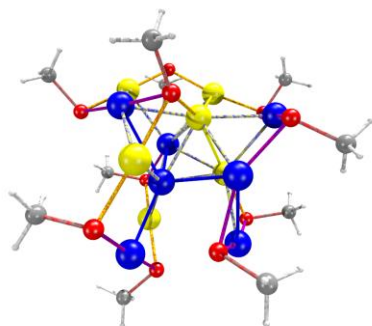

Iso8

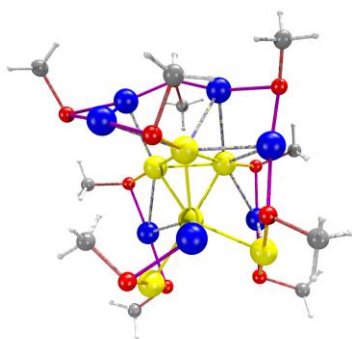

Iso9

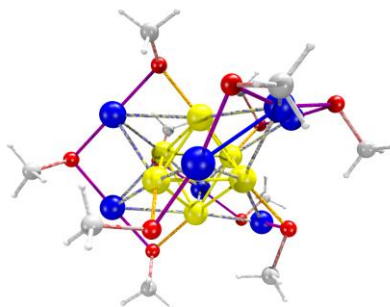

**Figure S3.** Structures of **Iso5-Iso9** isomers of the  $[\text{Au}_6\text{Ag}_7(\text{SCH}_3)_{10}]^+$  cluster with higher energies. Their relative energies with respect to **Iso1** are shown in Table S2.

## PART V

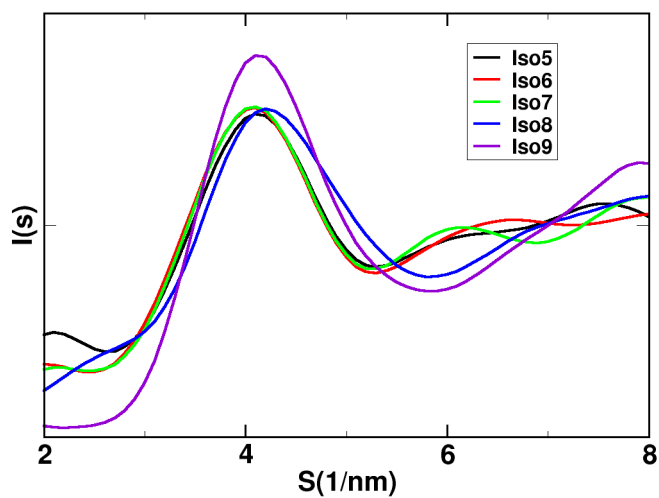

**Figure S4.** Simulated XRD patterns of **Iso5-Iso9**. The calculated XRD's curves were obtained with a modified program of the provided by Dr. Yong Pei. **Iso9** curve resembles monometallic  $[\text{Au}_{13}(\text{SCH}_3)_{10}]^+$  cluster curve. More information about the Debye formula used is in the reference: Y. Pei, R. Pal, C. Liu, Y. Gao, Z. Zhang and X-C. Zeng, *J. Am. Chem. Soc.* 2012, **134**, 3015-3024.

## PART VI

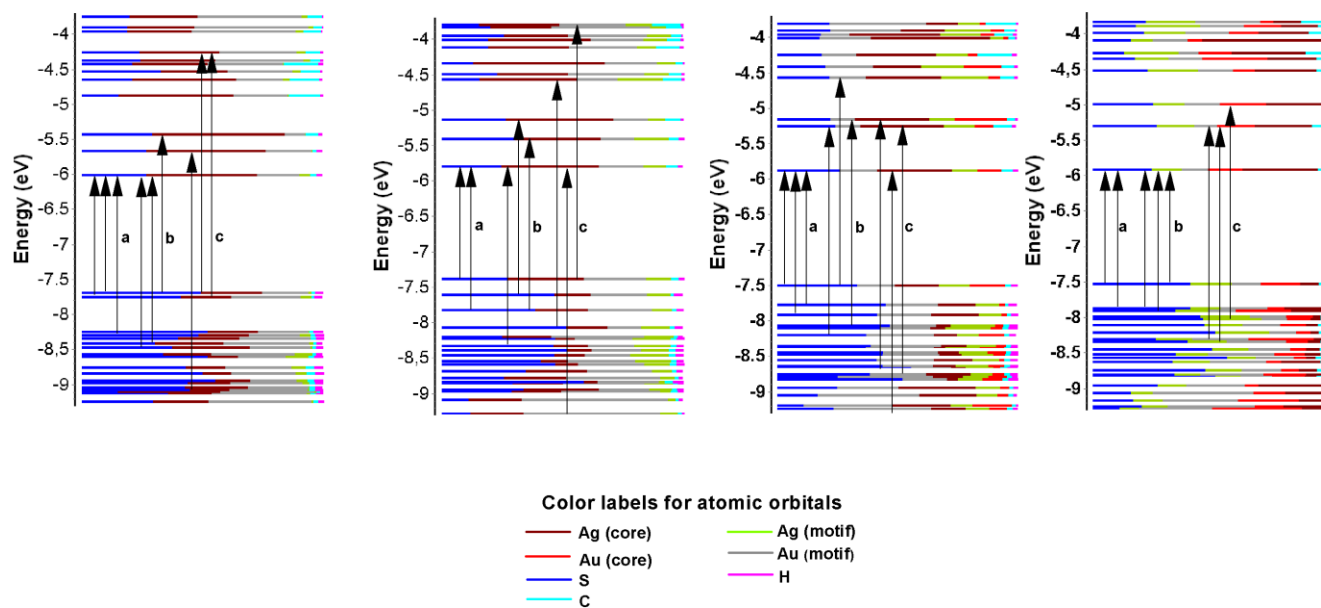

**Figure S5.** Kohn-Sham molecular orbital (MO) energies and the atomic orbital components in each MO for **Iso1-Iso4**. The electronic transitions of the three major peaks displayed in Figure 3 are depicted.

## PART VII

**Table S3.** Excitation energy, oscillator strength, electronic transitions, and relative contributions (in percentage) of the atomic orbitals to each molecular orbital for the major peaks shown in Fig. 3 of **Iso1-Iso4**.

| Peak             | E (eV), E (nm)                         | Oscillator Strength | From ---> To (%)   | Contribution weight<br>S, Ag(core), Ag(motif), Au(core), Au(motif) -><br>S, Ag(core), Ag(motif), Au(core), Au(motif) |                                         |        |                  |                                         |
|------------------|----------------------------------------|---------------------|--------------------|----------------------------------------------------------------------------------------------------------------------|-----------------------------------------|--------|------------------|-----------------------------------------|
| Iso1             | 1.77, (699.3)                          | 0.0000              | HOMO->LUMO (65%)   | 52, 28, 0, 0, 14 -> 23, 50, 8, 0, 16                                                                                 |                                         |        |                  |                                         |
|                  | a                                      | 1.91, (650.4)       | 0.0457             | H-1->LUMO (30%)                                                                                                      | 48, 20, 5, 0, 22 -> 23, 50, 8, 0, 16    |        |                  |                                         |
|                  |                                        |                     |                    | H-1->LUMO (59%)                                                                                                      | 48, 20, 5, 0, 22 -> 23, 50, 8, 0, 16    |        |                  |                                         |
|                  | b                                      | 2.54, (487.4)       | 0.0474             | HOMO->LUMO (25%)                                                                                                     | 52, 28, 0, 0, 14 -> 23, 50, 8, 0, 16    |        |                  |                                         |
|                  |                                        |                     |                    | H-3->LUMO(3%)                                                                                                        | 57, 16, 0, 0, 16 -> 23, 50, 8, 0, 16    |        |                  |                                         |
|                  |                                        |                     |                    | H-6->LUMO(37%)                                                                                                       | 48, 24, 0, 0, 22 -> 23, 50, 8, 0, 16    |        |                  |                                         |
|                  | c                                      | 3.52, (352.6)       | 0.0254             | H-5->LUMO(34%)                                                                                                       | 44, 15, 0, 0, 33 -> 23, 50, 8, 0, 16    |        |                  |                                         |
|                  |                                        |                     |                    | HOMO->L+2(8%)                                                                                                        | 52, 28, 0, 0, 14 -> -> 23, 61, 0, 0, 11 |        |                  |                                         |
|                  |                                        |                     |                    | H-15->L+1(41%)                                                                                                       | 30, 7, 0, 0, 53 -> 24, 47, 0, 0, 25     |        |                  |                                         |
|                  |                                        |                     |                    | HOMO->L+8(12%)                                                                                                       | 52, 28, 0, 0, 14 -> -> 23, 20, 0, 0, 42 |        |                  |                                         |
| H-1->L+8(9%)     |                                        |                     |                    | 48, 20, 5, 0, 22 -> 23, 20, 10, 0, 42                                                                                |                                         |        |                  |                                         |
| c                | 4.20, (295.0)                          | 0.0276              | H-8->L+6(37%)      | 61, 7, 8, 0, 16 -> 19, 32, 0, 0, 41                                                                                  |                                         |        |                  |                                         |
|                  |                                        |                     | H-5->L+8(14%)      | 44, 15, 0, 0, 33 -> 23, 20, 0, 10, 42                                                                                |                                         |        |                  |                                         |
|                  |                                        |                     | H-8->L+7(8%)       | 61, 7, 8, 0, 16 -> 26, 20, 0, 0, 45                                                                                  |                                         |        |                  |                                         |
|                  |                                        |                     | Iso2               | a                                                                                                                    | 1.78, (665.9)                           | 0.0437 | HOMO->LUMO (83%) | 32, 30, 12, 0, 21 -> 19, 39, 13, 23, 0  |
|                  |                                        |                     |                    |                                                                                                                      |                                         |        | H-2 -> LUMO(3%)  | 48, 16, 0, 21, 0 -> 19, 39, 13, 23, 0   |
| b                | 2.22, (559.4)                          | 0.0622              |                    | HOMO -> L+1 (77%)                                                                                                    | 32, 30, 12, 0, 21 -> 24, 31, 20, 0, 19  |        |                  |                                         |
|                  |                                        |                     |                    | HOMO -> L+2 (3%)                                                                                                     | 32, 30, 12, 0, 21 -> 15, 44, 11, 0, 21  |        |                  |                                         |
|                  |                                        |                     |                    | H-1 -> L+2 (3%)                                                                                                      | 55, 12, 0, 18, 0 -> 15, 44, 11, 0, 21   |        |                  |                                         |
|                  |                                        |                     |                    | H-6 -> LUMO (63%)                                                                                                    | 60, 0, 14, 17, 0 -> 19, 39, 13, 23, 0   |        |                  |                                         |
| c                | 2.58, (480.5)                          | 0.0375              |                    | H-1 -> L+2 (15%)                                                                                                     | 55, 12, 0, 18, 0 -> 15, 44, 11, 0, 21   |        |                  |                                         |
|                  |                                        |                     |                    | H-2 ->L+1 (5%)                                                                                                       | 48, 16, 0, 21, 0 -> 24, 31, 20, 0, 19   |        |                  |                                         |
|                  |                                        |                     |                    | H-3 ->L+3 (59%)                                                                                                      | 65, 0, 11, 11, 0 -> 17, 20, 15, 0, 40   |        |                  |                                         |
|                  |                                        |                     |                    | H-18 -> LUMO (8%)                                                                                                    | 14, 11, 0, 61, 0 -> 19, 39, 13, 23, 0   |        |                  |                                         |
|                  |                                        |                     | HOMO -> L+10 (4%)  | 32, 30, 12, 0, 21 -> 20, 0, 19, 0, 61                                                                                |                                         |        |                  |                                         |
|                  |                                        |                     | Iso3               | a                                                                                                                    | 1.83, (678.9)                           | 0.0477 | HOMO-> LUMO(80%) | 41, 14, 14, 12, 13 -> 21, 32, 15, 8, 18 |
| H-2 -> LUMO(4%)  | 51, 13, 11,0,18 -> 21, 32, 15, 8, 18   |                     |                    |                                                                                                                      |                                         |        |                  |                                         |
| b                | 2.51, (494.5)                          | 0.0331              |                    | H-1 -> LUMO (3%)                                                                                                     | 54, 13, 9, 0, 17-> 21, 32, 15, 8, 18    |        |                  |                                         |
|                  |                                        |                     |                    | HOMO -> L+2 (65%)                                                                                                    | 41, 14, 14, 12, 13 -> 18, 10, 22, 24,17 |        |                  |                                         |
|                  |                                        |                     |                    | H-8 -> LUMO (9%)                                                                                                     | 51, 5, 12, 5, 20 -> 21, 32, 15, 8, 18   |        |                  |                                         |
|                  |                                        |                     |                    | H-6 -> L+6 (6%)                                                                                                      | 48, 5, 12, 0, 25 -> 24, 21, 12, 0, 37   |        |                  |                                         |
| c                | 3.04, (408.2)                          | 0.0424              |                    | H-5 -> L+1 (40%)                                                                                                     | 48, 6, 10, 5,24 -> 20, 25, 22, 7, 17    |        |                  |                                         |
|                  |                                        |                     |                    | HOMO -> L+3 (21%)                                                                                                    | 41, 14, 14, 12, 13 -> 18, 0, 36, 14, 25 |        |                  |                                         |
|                  |                                        |                     |                    | H-3 -> L+2 (12%)                                                                                                     | 55, 0, 18, 0, 16 -> 18, 10, 22, 24,17   |        |                  |                                         |
|                  |                                        |                     |                    | H-12 -> L+2 (24%)                                                                                                    | 60, 0, 11, 0, 14 -> 18, 10, 22, 24,17   |        |                  |                                         |
|                  |                                        |                     | H-21 -> LUMO (19%) | 8, 15, 5, 23, 47 -> 21, 32, 15, 8, 18                                                                                |                                         |        |                  |                                         |
|                  |                                        |                     | H-13 -> L+1 (14%)  | 49, 8, 11, 0, 21 -> 20, 25, 22, 7, 17                                                                                |                                         |        |                  |                                         |
| c                | 3.57, (346.9)                          | 0.0175              | H-36 -> LUMO (38%) | 7, 25, 10, 12, 39-> 21, 32, 15, 8, 18                                                                                |                                         |        |                  |                                         |
|                  |                                        |                     | H-5 -> L+6 (8%)    | 48, 6, 10, 5,24 -> 24, 21, 12, 0, 37                                                                                 |                                         |        |                  |                                         |
|                  |                                        |                     | H-6 -> L+5 (7%)    | 48, 5, 12, 0, 25 -> 17, 20, 26, 0, 30                                                                                |                                         |        |                  |                                         |
|                  |                                        |                     | Iso4               | a                                                                                                                    | 1.81, (685.0)                           | 0.0478 | HOMO->LUMO (83%) | 45, 10, 17, 13, 9 -> 22, 27, 22, 10, 13 |
| H-1 -> LUMO (5%) | 51, 9, 14, 0, 16 -> 22, 27, 22, 10, 13 |                     |                    |                                                                                                                      |                                         |        |                  |                                         |
| b                | 2.05, (604.4)                          | 0.0311              |                    | H-1->LUMO (70%)                                                                                                      | 51, 9, 14, 0, 16 -> 22, 27, 22,10, 13   |        |                  |                                         |
|                  |                                        |                     |                    | H-2->LUMO (17%)                                                                                                      | 46, 7, 15, 15, 10 -> 22, 27, 22, 10, 13 |        |                  |                                         |
|                  |                                        |                     |                    | HOMO->LUMO (2%)                                                                                                      | 45, 10, 17, 13, 9 -> 22, 27, 22, 10, 13 |        |                  |                                         |
| c                | 2.50, (494.0)                          | 0.0095              |                    | H-8 -> LUMO (78%)                                                                                                    | 46, 0, 18, 9, 19 -> 22, 27, 22,10, 13   |        |                  |                                         |
|                  |                                        |                     |                    | H-7 -> LUMO (9%)                                                                                                     | 37, 0, 19, 13, 22 -> 22, 27, 22,10, 13  |        |                  |                                         |
|                  |                                        |                     |                    | H-7->L+1 (35%)                                                                                                       | 37, 0, 19, 13, 22 -> 23, 17, 25, 0, 16  |        |                  |                                         |
|                  |                                        |                     |                    | H-8->L+1 (19%)                                                                                                       | 46, 0, 18, 9, 19 -> 23, 17, 25, 0, 16   |        |                  |                                         |
|                  |                                        |                     |                    | H-4->L+2 (16%)                                                                                                       | 53, 0, 24, 7, 8 -> 18, 0, 29, 26, 21    |        |                  |                                         |
| c                | 3.13, (395.9)                          | 0.0433              | H-22->LUMO (62%)   | 10, 6, 6, 34, 40 -> 18, 0, 29, 26, 21                                                                                |                                         |        |                  |                                         |
|                  |                                        |                     | H-4->L+3 (7%)      | 53, 0, 24, 7, 8 -> 18, 0, 41, 14, 20                                                                                 |                                         |        |                  |                                         |
|                  |                                        |                     | H-3->L+3 (6%)      | 55, 0, 19, 6, 13 -> 18, 0, 41, 14, 20                                                                                |                                         |        |                  |                                         |
|                  |                                        |                     | H-3->L+3 (6%)      | 55, 0, 19, 6, 13 -> 18, 0, 41, 14, 20                                                                                |                                         |        |                  |                                         |

## PART VIII

Relaxed Cartesian coordinates of **Iso1-Iso4**.

Coordinates **Iso1**.

|    |           |           |           |
|----|-----------|-----------|-----------|
| Ag | -1.922099 | 0.655387  | 0.743552  |
| Ag | 1.007576  | 1.056831  | 1.102176  |
| Ag | -0.231724 | -1.601563 | 1.316326  |
| Ag | -0.228908 | 1.442376  | -1.351752 |
| Ag | 1.429460  | -0.920023 | -0.876748 |
| Ag | -1.396857 | -1.258842 | -1.270803 |
| Au | 2.572000  | -1.838119 | 1.896619  |
| Au | 0.717174  | -3.778337 | -0.554821 |
| Au | -3.612399 | -1.654496 | 0.846519  |
| Au | -0.825425 | 3.451975  | 1.242970  |
| Au | 3.896017  | 0.716590  | -1.439222 |
| Ag | 2.332597  | 3.489283  | -0.245528 |
| Au | -3.456095 | 0.734068  | -1.882921 |
| S  | 0.294141  | 4.848029  | -0.306276 |
| S  | -5.030203 | -0.747219 | -0.850052 |
| S  | -2.215028 | -2.678263 | 2.469617  |
| S  | -2.092877 | 2.158134  | 2.797862  |
| S  | 2.493080  | -4.057230 | 1.023994  |
| S  | 2.664714  | 0.323187  | 2.885508  |
| S  | 3.283300  | -1.274958 | -2.589698 |
| S  | -1.124121 | -3.642723 | -2.057258 |
| S  | 4.640847  | 2.755504  | -0.500167 |
| S  | -1.923064 | 2.055621  | -3.144959 |
| C  | 0.807283  | 6.328308  | 0.684538  |
| C  | -6.190837 | 0.359618  | 0.068833  |
| C  | -2.518821 | -1.712333 | 4.015531  |
| C  | -3.758578 | 2.964497  | 2.780239  |
| C  | 4.005625  | -4.197778 | -0.029517 |
| C  | 1.751169  | 0.167675  | 4.484413  |
| C  | 2.705829  | -0.625240 | -4.224340 |
| C  | -0.316117 | -3.540853 | -3.716644 |
| C  | 5.350428  | 2.365468  | 1.158486  |
| C  | -2.446389 | 3.798223  | -2.820809 |
| H  | 1.491527  | 6.920148  | 0.059632  |
| H  | 1.306118  | 6.039756  | 1.618306  |
| H  | -0.091925 | 6.919622  | 0.906401  |
| H  | -6.782068 | 0.911537  | -0.675407 |
| H  | -5.654819 | 1.058914  | 0.722493  |
| H  | -6.856141 | -0.281654 | 0.664182  |
| H  | -1.800361 | -2.074972 | 4.765613  |
| H  | -3.539307 | -1.921037 | 4.365594  |
| H  | -2.384081 | -0.633136 | 3.856942  |
| H  | -4.463139 | 2.275851  | 3.270071  |
| H  | -4.096167 | 3.179490  | 1.757953  |
| H  | -3.705406 | 3.898317  | 3.357097  |
| H  | 4.880383  | -4.129685 | 0.632233  |
| H  | 4.041341  | -3.414912 | -0.798289 |
| H  | 3.977982  | -5.189915 | -0.502322 |
| H  | 2.338526  | -0.460819 | 5.167858  |
| H  | 0.751388  | -0.261504 | 4.340424  |
| H  | 1.660045  | 1.180309  | 4.903530  |
| H  | 2.333462  | -1.482209 | -4.804922 |
| H  | 3.559896  | -0.178920 | -4.751659 |
| H  | 1.907197  | 0.118835  | -4.108604 |
| H  | -1.083277 | -3.226336 | -4.439002 |
| H  | 0.050658  | -4.541060 | -3.986409 |
| H  | 0.515851  | -2.824532 | -3.714512 |
| H  | 6.269638  | 1.783384  | 1.004816  |
| H  | 4.649630  | 1.805525  | 1.790545  |
| H  | 5.602779  | 3.323896  | 1.634721  |

H -3.424300 3.965862 -3.292952  
H -2.492200 4.017840 -1.746361  
H -1.695987 4.449768 -3.291445

Coordinates of **Iso2**.

Ag 1.534573 2.019275 1.401651  
Ag -1.448247 -0.981180 -1.119071  
Ag 1.145412 -0.562313 -0.081160  
Ag -0.193877 1.645847 -1.282561  
Ag -0.627047 -2.070247 1.960519  
Au -1.588033 3.508702 0.624686  
Ag 3.875564 -1.579313 -0.247765  
Au 2.082662 -0.969765 2.723466  
Ag -1.246139 0.665397 1.098269  
Au 1.281170 -1.779226 -2.797116  
Au -3.837051 0.872237 -0.557329  
Au -3.201114 -2.739323 0.387855  
Au 2.779997 1.855958 -1.342978  
H -0.009764 -1.468703 5.473711  
C -0.268521 -0.426061 5.249522  
S -0.016421 -0.066763 3.448674  
H 0.361780 0.260563 5.831311  
H -1.328374 -0.241322 5.475470  
S -1.013948 -2.192610 -3.278805  
C -1.240660 -3.995828 -2.938929  
H -2.315981 -4.211503 -3.025026  
H -0.694971 -4.566426 -3.703438  
H -0.893471 -4.277415 -1.936510  
S 3.624149 -1.379715 -2.665257  
C 4.326203 -2.971538 -3.305866  
H 4.090065 -3.042095 -4.376896  
H 5.417076 -2.928607 -3.174409  
H 3.918009 -3.841637 -2.775742  
S 3.972925 1.501959 0.693886  
C 4.957433 3.051403 0.937617  
H 5.321228 3.044729 1.975424  
H 5.812461 3.040647 0.247415  
H 4.347587 3.947033 0.762292  
H -2.866266 -5.906112 2.077103  
C -2.156425 -5.160088 2.460527  
S -1.458057 -4.222268 1.024390  
H -2.660728 -4.497731 3.175169  
H -1.317999 -5.672479 2.954498  
H -4.950440 3.840229 0.626782  
C -4.725650 4.089924 -0.417448  
S -3.260760 3.143683 -1.038556  
H -4.492213 5.160127 -0.511465  
H -5.579358 3.839190 -1.063147  
H -4.514819 -1.766251 -2.598860  
C -5.391093 -1.734126 -1.938340  
S -4.924583 -1.227193 -0.221992  
H -5.858057 -2.727197 -1.873004  
H -6.124161 -1.006129 -2.313571  
H 1.178088 4.549065 -2.494761  
C 1.311822 4.022601 -3.448608  
S 1.344303 2.185977 -3.229070  
H 2.251747 4.338911 -3.922480  
H 0.471026 4.255388 -4.118393  
H 2.978522 -4.085969 1.843528  
C 3.873359 -3.747087 2.381600  
S 4.163711 -1.932754 2.157039  
H 4.760682 -4.270318 1.996722  
H 3.768589 -3.954091 3.455599  
H 1.241685 5.376172 0.736459  
C 0.879159 5.437249 1.770789  
S 0.044274 3.873841 2.301700  
H 0.172715 6.272682 1.873434  
H 1.728009 5.595094 2.452771



Coordinates of **Iso3**.

Ag 2.014167 1.900045 1.305210  
Ag -1.569318 -1.055424 -0.990568  
Ag 1.121529 -0.761755 -0.065419  
Ag 0.033452 1.290125 -1.809426  
Ag -2.296441 -1.548384 2.390361  
Au -0.718022 3.893731 0.321463  
Ag 3.542954 -2.294296 0.396309  
Au 1.385574 -0.871626 2.905465  
Au -0.933877 1.021399 0.721493  
Au 1.219681 -2.789366 -2.119485  
Ag -2.856212 1.651575 -1.426035  
Au -4.267453 -1.668213 -0.110623  
Au 3.034088 1.071673 -1.565257  
H -0.800505 0.268128 5.572470  
C -0.951956 1.011617 4.778528  
S -0.729263 0.202356 3.132367  
H -0.222863 1.829202 4.856944  
H -1.974109 1.412876 4.815299  
S -1.115273 -3.072293 -2.428034  
C -1.557226 -4.517011 -1.363020  
H -2.654649 -4.564318 -1.309100  
H -1.172210 -5.431669 -1.834983  
H -1.147891 -4.415443 -0.349502  
S 3.590017 -2.579690 -2.032465  
C 4.147217 -4.330158 -2.281255  
H 3.963837 -4.601175 -3.330296  
H 5.227243 -4.364269 -2.077783  
H 3.619071 -5.027832 -1.618709  
S 4.149251 0.795614 0.526344  
C 5.445387 2.120118 0.539287  
H 5.829820 2.187553 1.567234  
H 6.255623 1.822253 -0.140549  
H 5.032888 3.088564 0.228952  
H -6.087524 -3.776021 2.190111  
C -5.263427 -3.241839 2.682945  
S -3.793386 -3.295566 1.557159  
H -5.569950 -2.212945 2.908737  
H -4.989883 -3.765366 3.610238  
H -3.993270 4.606273 -0.164777  
C -3.556045 5.010643 -1.086427  
S -2.069129 4.044819 -1.621235  
H -3.252641 6.055353 -0.930170  
H -4.290896 4.960004 -1.903019  
H -3.575922 -1.326482 -3.457491  
C -4.539817 -0.808025 -3.365569  
S -4.730833 0.003055 -1.715433  
H -5.364699 -1.522771 -3.492732  
H -4.618564 -0.020377 -4.128705  
H 1.846446 3.786309 -3.118561  
C 2.006138 3.144121 -3.994274  
S 1.791950 1.350088 -3.591118  
H 3.017973 3.296578 -4.395048  
H 1.266487 3.391153 -4.769716  
H 2.127643 -4.154102 2.873162  
C 2.959827 -3.727965 3.448114  
S 3.430461 -2.045652 2.835440  
H 3.848030 -4.368769 3.348663  
H 2.685316 -3.651597 4.509184  
H 2.230985 5.308992 1.113313  
C 1.767398 5.251341 2.106445  
S 0.656421 3.778342 2.259145  
H 1.174279 6.157395 2.293864  
H 2.546047 5.159377 2.877961

#### Coordinates of Iso4.

|    |           |           |           |
|----|-----------|-----------|-----------|
| Ag | 2.193394  | 1.998390  | 0.893689  |
| Ag | -1.446175 | -1.223428 | -0.891959 |
| Ag | 1.286762  | -0.765760 | -0.088790 |
| Au | -0.041364 | 1.134928  | -1.845082 |
| Ag | -2.179040 | -1.594753 | 2.524244  |
| Au | -0.811583 | 3.836786  | 0.466891  |
| Ag | 3.869582  | -1.950241 | 0.429293  |
| Au | 1.656110  | -0.529733 | 2.882452  |
| Au | -0.776678 | 0.959328  | 0.727367  |
| Au | 1.437924  | -2.955229 | -1.915446 |
| Ag | -2.898119 | 1.455571  | -1.293223 |
| Au | -4.110704 | -1.911582 | 0.037014  |
| Ag | 2.877479  | 1.299367  | -2.222057 |
| H  | -0.657675 | 0.746297  | 5.479081  |
| C  | -0.886352 | 1.305953  | 4.562160  |
| S  | -0.604566 | 0.212296  | 3.105147  |
| H  | -0.235672 | 2.184846  | 4.458641  |
| H  | -1.941486 | 1.611810  | 4.549831  |
| S  | -0.886584 | -3.379484 | -2.085883 |
| C  | -1.205900 | -4.725765 | -0.861442 |
| H  | -2.296076 | -4.817403 | -0.749575 |
| H  | -0.796316 | -5.665390 | -1.257403 |
| H  | -0.756989 | -4.502096 | 0.114973  |
| S  | 3.788319  | -2.578214 | -1.938884 |
| C  | 4.466591  | -4.302674 | -1.967375 |
| H  | 4.266001  | -4.732457 | -2.958566 |
| H  | 5.552687  | -4.231977 | -1.811643 |
| H  | 4.016426  | -4.932867 | -1.189683 |
| S  | 4.224825  | 1.031446  | -0.204734 |
| C  | 5.453388  | 2.421174  | -0.168282 |
| H  | 5.853287  | 2.495663  | 0.852712  |
| H  | 6.266156  | 2.173580  | -0.865551 |
| H  | 4.993008  | 3.373943  | -0.459744 |
| H  | -5.912075 | -3.932250 | 2.435563  |
| C  | -5.111036 | -3.344218 | 2.904581  |
| S  | -3.623283 | -3.430054 | 1.804745  |
| H  | -5.449246 | -2.311909 | 3.057506  |
| H  | -4.838533 | -3.798381 | 3.867999  |
| H  | -4.193627 | 4.062726  | 0.560949  |
| C  | -3.965696 | 4.620029  | -0.356556 |
| S  | -2.470810 | 3.945916  | -1.212508 |
| H  | -3.786286 | 5.677541  | -0.116922 |
| H  | -4.808765 | 4.542016  | -1.058557 |
| H  | -3.318797 | -1.626088 | -3.314375 |
| C  | -4.319401 | -1.176324 | -3.265997 |
| S  | -4.624533 | -0.338693 | -1.646391 |
| H  | -5.086722 | -1.951055 | -3.401396 |
| H  | -4.426341 | -0.413729 | -4.050743 |
| H  | 1.044475  | 3.906142  | -3.352606 |
| C  | 0.947622  | 3.311942  | -4.270237 |
| S  | 1.098584  | 1.496301  | -3.943416 |
| H  | 1.737741  | 3.589803  | -4.982816 |
| H  | -0.035550 | 3.496331  | -4.725278 |
| H  | 2.978833  | -3.598660 | 3.300300  |
| C  | 3.754315  | -2.945429 | 3.720441  |
| S  | 3.868325  | -1.338013 | 2.809631  |
| H  | 4.736782  | -3.433006 | 3.639222  |
| H  | 3.539748  | -2.736613 | 4.777528  |
| H  | 2.138062  | 5.434718  | 0.837757  |
| C  | 1.854207  | 5.294376  | 1.888577  |
| S  | 0.883978  | 3.737362  | 2.131003  |
| H  | 1.241491  | 6.142677  | 2.224513  |
| H  | 2.755669  | 5.224457  | 2.514954  |
